# Supplementary material
Source: publisher figshare collection journal article supplement (https://adisjournals.figshare.com/ndownloader/files/38786685)
Supplement: Supplementary file 1 [file 38786685]

# Bimekizumab Efficacy and Safety in Japanese Patients with Plaque Psoriasis in BE VIVID – a Phase 3, Ustekinumab and Placebo Controlled Study

Akihiko Asahina, Yukari Okubo, Akimichi Morita, Yayoi Tada, Atsuyuki Igarashi, Richard G. Langley, Delphine Deherder, Mizuho Matano, Veerle Vanvoorden, Maggie Wang, Mamitaro Ohtsuki, Hidemi Nakagawa

## Study Design

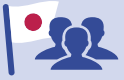

108 Japanese patients with plaque psoriasis received different treatments

**62 patients**

Bimekizumab 320 mg every 4 weeks

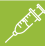

**29 patients**

Ustekinumab 45/90 mg every 12 weeks

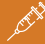

**17 patients**

Placebo\*

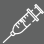

Bimekizumab 320 mg every 4 weeks

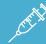

Study Start

Week 16

Week 52

\*Patients who first received placebo were switched at Week 16 to receive bimekizumab.

## Key Results

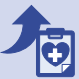

Throughout the study, **bimekizumab-treated patients** had **improved clinical response** versus ustekinumab and placebo

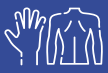

**PASI 90**

86%

of patients showed at least 90% improvement in skin inflammation since the start of the study

81%

52%

48%

6%

65%

Week 16

Week 52

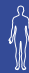

**IGA 0/1**

82%

of patients showed a clinically meaningful improvement in overall disease severity

74%

48%

45%

0%

65%

Week 16

Week 52

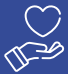

**DLQI 0/1**

66%

of patients showed no residual impact of psoriasis on quality of life

69%

31%

59%

12%

71%

Week 16

Week 52

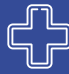

- Similar safety events were experienced by Japanese and global patient populations
- Candidiasis was more common in patients receiving bimekizumab than ustekinumab

DLQI 0/1: Dermatology Life Quality Index score of 0 or 1, indicating 'no effect of psoriasis on patient's life'; IGA 0/1: Investigator's Global Assessment score of clear or almost clear with at least two category improvement relative to study start; PASI 90:  $\geq 90\%$  improvement in Psoriasis Area and Severity Index from study start.

**Conclusion:** Bimekizumab resulted in improved clinical response versus ustekinumab and placebo, and was well-tolerated in Japanese patients

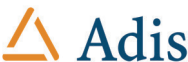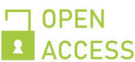

PEER-REVIEWED  
FEATURE

The graphical abstract represents the opinions of the authors.  
For a full list of declarations, including funding and author disclosure statements, and copyright information, please see the full text online.
